# Supplementary material
Source: publisher figshare collection journal article supplement (https://geolsoc.figshare.com/ndownloader/files/5420960)
Supplement: Supplementary file 1 [file 5420960]

	Stage	Age of midpoint	Duration	Sea level		Non-marine area	Sampling	Taxic diversity estimates (TDEs)				Composite TDEs		Log10-transformed TDEs
		Gradstein et al 2005	Gradstein et al 2005	Haq et al 1987	Miller et al 2001	Smith et al 1994	FMF	Plesiopedal	Snakes: plesio/hydropedal?	Hydropedal Undulating	Hydropedal Non-undulating	Undulating	TotalTDE	Open ocean TDE	Shalllow marine TDE	Total TDE
Raw data
1	Hettangian	198.05	3.1	15.13	no value	150	35	0	0	0	10	0	10	1.041392685	0	1.041392685
2	Sinemurian	193.05	6.9	35.63	no value	146	39	0	0	0	13	0	13	1.146128036	0	1.146128036
3	Pliensbachian	186.3	6.6	51.03	no value	142	48	0	0	0	2	0	2	0.477121255	0	0.477121255
4	Toarcian	179.3	7.4	49.57	no value	139	34	5	0	0	26	5	31	1.431363764	0.77815125	1.505149978
5	Aalenian	173.6	4	77.17	no value	138.5	16	0	0	0	0	0	0	0	0	0
6	Bajocian	169.65	3.9	94.2	-31.4	138	48	0	0	1	4	1	5	0.698970004	0.301029996	0.77815125
7	Bathonian	166.2	3	54.31	-30.83	133	46	6	0	3	0	9	9	0	1	1
8	Callovian	162.95	3.5	60.95	-21.63	128	60	4	0	6	16	10	26	1.230448921	1.041392685	1.431363764
9	Oxfordian	158.45	5.5	107.31	-14.95	132	92	2	0	3	4	5	9	0.698970004	0.77815125	1
10	Kimmeridgian	153.25	4.9	140.56	-1	130	51	3	0	9	10	12	22	1.041392685	1.113943352	1.361727836
11	Tithonian	148.15	5.3	113.96	-8.76	130	79	2	0	11	12	13	25	1.113943352	1.146128036	1.414973348
12	Berriasian	142.85	5.3	133.24	-18.71	127	57	1	0	0	1	1	2	0.301029996	0.301029996	0.477121255
13	Valanginian	138.3	3.8	84.15	-18.9	127	77	2	0	3	1	5	6	0.301029996	0.77815125	0.84509804
14	Hauterevian	133.2	6.4	90.9	-25.7	125	55	1	0	0	1	1	2	0.301029996	0.301029996	0.477121255
15	Barremian	127.5	5	160.78	0.41	125	55	0	0	0	4	0	4	0.698970004	0	0.698970004
16	Aptian	118.5	13	154.5	-7.43	131	108	0	0	0	8	0	8	0.954242509	0	0.954242509
17	Albian	105.8	12.4	187.22	9.58	129	163	0	0	0	24	0	24	1.397940009	0	1.397940009
18	Cenomanian	96.55	6.1	225.98	47.02	118	114	19	7	0	15	26	41	1.204119983	1.431363764	1.62324929
19	Turonian	91.4	4.2	226.75	22.62	121	87	11	0	4	12	15	27	1.113943352	1.204119983	1.447158031
20	Coniacian	87.55	3.5	230.75	17.46	118	47	0	0	6	6	6	12	0.84509804	0.84509804	1.113943352
21	Santonian	84.65	2.3	214.61	24.69	118	62	0	0	15	11	15	26	1.079181246	1.204119983	1.431363764
22	Campanian	77.05	12.9	224.14	32.18	110	146	0	0	31	26	31	57	1.431363764	1.505149978	1.763427994
23	Maastrichtian	68.05	5.1	195.04	30.92	109	130	7	0	31	20	38	58	1.322219295	1.591064607	1.770852012
LS regressions vs. time
Full series	Gradient		-0.018839	-1.6612	-0.64033	0.248	-0.66684	-	-	-	-0.072954	-0.17797	-0.25092
	Intercept		8.419	355.55	79.641	94.815	163.32	-	-	-	19.85	32.845	52.696
	p=value		0.26004	2.04E-11	7.23E-07	6.02E-11	0.00023495	-	-	-	0.10393	0.00062294	0.0026579
Excluding Lagerstatten	Gradient		-0.025098	-1.6532	-0.68439	0.25189	-0.65743	-	-	-	-0.13398	-0.20121	-0.33519
	Intercept		9.1282	354.08	83.626	94.678	162.63	-	-	-	25.904	34.914	60.817
(italicised)	p=value		0.21215	2.17E-09	1.29E-06	2.11E-09	0.0024751	-	-	-	0.0025271	0.0012974	0.00036815
Detrended data series
(based on full series)
1	Hettangian			-11.41934	no value	6.0686	3.747662				no statistically	2.4019585	6.998706
2	Sinemurian			0.77466	no value	3.3086	4.413462				significant trend	1.5121085	8.744106
3	Pliensbachian			4.96156	no value	0.9826	8.912292				detected so	0.310811	-3.949604
4	Toarcian			-8.12684	no value	-0.2814	-9.755588				use non-detre-	4.065021	23.293956
5	Aalenian			10.00432	no value	0.6322	-31.556576				nded data	-1.949408	-9.136288
6	Bajocian			20.47258	-2.4090155	1.1118	-2.190594					-1.6523895	-5.127422
7	Bathonian			-25.14856	-4.048154	-3.0326	-6.491192					5.733614	-1.993096
8	Callovian			-23.90746	3.0707735	-7.2266	5.341578					6.1552115	14.191414
9	Oxfordian			14.97714	6.8692885	-2.1106	34.340798					0.3543465	-3.937726
10	Kimmeridgian			39.5889	17.4895725	-2.821	-10.12677					6.4289025	7.75749
11	Tithonian			4.51678	6.4638895	-1.5562	14.472346					6.5212555	9.477798
12	Berriasian			14.99242	-6.8798595	-3.2418	-11.061906					-6.4219855	-14.852078
13	Valanginian			-41.65604	-9.983361	-2.1134	5.903972					-3.231749	-11.993764
14	Hauterevian			-43.37816	-20.049044	-2.8486	-19.496912					-8.139396	-17.273456
15	Barremian			17.033	2.411075	-1.435	-23.2979					-10.153825	-16.7037
16	Aptian			-4.1978	-11.191895	6.797	23.70054					-11.755555	-14.96198
17	Albian			7.42496	-2.314086	7.9466	70.231672					-14.015774	-2.148664
18	Cenomanian			30.81886	29.2028615	-0.7594	15.063402					10.3380035	12.530326
19	Turonian			23.03368	1.505162	3.5178	-15.370824					-1.578542	-2.761912
20	Coniacian			20.63806	-6.1201085	1.4726	-57.938158					-11.2637265	-18.727954
21	Santonian			-0.31942	-0.7470655	2.1918	-44.871994					-2.7798395	-5.455622
22	Campanian			-3.41454	1.8764265	-3.9234	34.060022					11.8675885	23.637386
23	Maastrichtian			-47.46534	-5.1465435	-2.6914	12.058462					17.2658585	22.379106
Serial correlation coefficient
(lag = 1 interval)
	Slope of LS regression			0.2111	0.19051	0.51415	0.26946				0.08904	0.35441	0.267
	Intercept			2.0552	0.27574	0.2639	-0.4993				8.4894	-0.074575	-0.93273
	p-value			0.29492	0.46145	0.02166	0.22324				0.68261	0.065016	0.1988
Detrended data series
(excluding Lagerstatten stages)
1	Hettangian			-11.53374	no value	5.4351855	2.5740115				10.630739	4.9356405	15.5673795
2	Sinemurian			0.70026	no value	2.6946355	3.2868615				12.960839	3.9295905	16.8914295
3	Pliensbachian			4.94116	no value	0.394893	7.849209				1.056474	2.571423	3.628897
4	Toarcian			-8.09124	no value	-0.841877	-10.752801				24.118614	6.162953	30.282567
5	Aalenian			10.08552	no value	0.093896	-32.500152				-2.645072	0.016056	-2.628016
6	Bajocian			20.58538	1.0807635	0.5888615	-3.0970005				0.825707	0.2212765	1.0479835
7	Bathonian			-25.00816	-0.710382	-3.542118	-7.365134				-3.636524	7.527102	3.891578
8	Callovian			-23.74106	6.2653505	-7.7234755	4.4982185				11.928041	7.8731695	19.8022105
9	Oxfordian			15.17954	9.8655955	-2.5899705	33.5397835				-0.674869	1.9677245	1.2938555
10	Kimmeridgian			39.8329	20.2567675	-3.2801425	-10.8788525				4.628435	7.9214325	12.5508675
11	Tithonian			4.80158	9.0063785	-1.9955035	13.7682545				5.945137	7.8952615	13.8413985
12	Berriasian			15.31962	-4.5708885	-3.6604865	-11.7161245				-5.764957	-5.1711515	-10.9351085
13	Valanginian			-41.29244	-7.874863	-2.514387	5.292569				-6.374566	-2.086657	-8.460223
14	Hauterevian			-42.97376	-18.165252	-3.229748	-20.060324				-7.057864	-7.112828	-14.169692
15	Barremian			17.483	4.043725	-1.793975	-23.807675				-4.82155	-9.259725	-14.080275
16	Aptian			-3.6758	-9.955785	6.473035	23.275455				-2.02737	-11.070615	-13.096985
17	Albian			8.04856	-1.637538	7.672038	69.926094				12.271084	-13.625982	-1.353898
18	Cenomanian			31.51646	29.4718545	-0.9979795	14.8448665				2.031769	10.5128255	12.5455945
19	Turonian			23.77248	1.547246	3.299254	-15.540898				-1.658228	-1.523406	-3.180634
20	Coniacian			21.40766	-6.2476555	1.2690305	-58.0720035				-8.174051	-11.2980645	-19.4711155
21	Santonian			0.47338	-1.0023865	1.9995115	-44.9785505				-3.562593	-2.8815735	-6.4431665
22	Campanian			-2.56094	1.2862495	-4.0861245	34.0249815				10.419159	11.5892305	22.0093895
23	Maastrichtian			-46.53974	-6.1332605	-2.8191145	12.1081115				3.213339	16.7783405	19.9926795
Serial correlation coefficient
(lag = 1 interval)
	Slope of LS regression			0.21317	0.20042	0.51751	0.26896				0.078467	0.383	0.33905
	Intercept			2.3159	1.6212	0.055223	-0.97683				2.1384	0.04887	1.7204
	p-value			0.2917	0.43354	0.020233	0.22381				0.73496	0.051599	0.11611
Excluding Lagerstatten stages
	Slope of LS regression			0.13896	0.064294	0.41812	0.27902				0.22704	0.31197	0.38555
	Intercept			2.4979	0.41375	0.28275	-0.63015				-0.044613	-0.84716	-0.77727
	p-value			0.53309	0.81781	0.1038	0.25992				0.40808	0.15213	0.10067
Generalised difference-transformed data series						Detrended (DT) based on full data series						Detrended (DT) based on full data series
1	Hettangian					5.205039945						2.246047687
2	Sinemurian					0.18842931						0.660830388
3	Pliensbachian					-0.71851669						-0.225095373
4	Toarcian					-0.78660379						3.954866473
5	Aalenian					0.77688181						-3.390092093
6	Bajocian					0.78675437						-0.961499811
7	Bathonian					-3.60423197						6.319237363
8	Callovian					-5.66738871						4.123161362
9	Oxfordian					1.60495639						-1.827122008
10	Kimmeridgian					-1.73583501						6.303318557
11	Tithonian					-0.10578285						4.242788165
12	Berriasian					-2.44167977						-8.733183662
13	Valanginian					-0.44662853						-0.955733119
14	Hauterevian					-1.76199539						-6.994031837
15	Barremian					0.02960769						-7.269141664
16	Aptian					7.53480525						-8.156937882
17	Albian					4.45192245						-9.849487752
18	Cenomanian					-4.84514439						15.30533396
19	Turonian					3.90824551						-5.24243382
20	Coniacian					-0.33607687						-10.70427543
21	Santonian					1.43466271						1.212137809
22	Campanian					-5.05031397						12.85279142
23	Maastrichtian					-0.67418389						13.05986646
